# Supplementary material for: Global Prevalence of Diabetes
Source: Oxford University Press journal article supplement (doi:10.2337/diacare.27.5.1047), 2004-05-01
Supplement: 1047-sup-wild_appendix.xls [file 1047-sup-wild_appendix.xls]

## Sheet: Sheet1
								Number of people with diabetes (000)
											Age group (years)
Country	Year	Population - all ages (000)	Prevalence -all ages (%)	Population - 20+ years (000)	Prevalence - 20+ years (%)	Rural	Urban	Male	Female	0-19	20-44	45-64	65+	Total
World	2000	6.03741e+06	2.83612	3.6736e+06	4.63995			81727.1	89500.8	774.391	33478.5	83104.3	53870.7	171228
World	2030	8.24125e+06	4.44364	5.67464e+06	6.44008			175326	190886	760.8	58769.5	175842	130839	366212
Developed	2000	1.18615e+06	4.7155	887106	6.27051			25776	30158	307.3	4583.1	24223.1	26819.9	55933
Developed	2030	1.21604e+06	6.75273	971420	8.42525			38871.6	43244.3	271.345	4027.2	30428.6	47388.8	82116
Developing	2000	4.85125e+06	2.3766	2.7865e+06	4.12085	46795	68499	55951	59343	467.1	28895.4	58881.2	27050.8	115295
Developing	2030	7.02521e+06	4.04395	4.70322e+06	6.03005	73604	210492	136454	147642	489.5	54742.3	145414	83450.3	284096
China	2000	1.28135e+06	1.61991	862035	2.40229	14093	6663	9816.31	10940.5	48.171	3014.86	11312.3	6381.43	20756.8
China	2030	1484617	2.85062	1133976	3.72852	17139.9	25180.8	19066.9	23253.8	40.2816	3316.19	21816.4	17147.9	42320.8
EME	2000	848894	5.21478	638532	6.89325			21064.2	23203.8	252.405	2997.73	18835.3	22182.5	44268
EME	2030	925772	7.36203	733909	9.25407			33100.1	35055.5	239.152	2721.19	24307.1	40888.2	68155.6
Andorra	2000	85.4842	6.70318	65.1524	8.77011			2.62258	3.10758	0.0162245	0.512156	2.18301	3.01877	5.73016
Andorra	2030	193.998	9.33133	156.571	11.5429			8.44895	9.65365	0.0298666	0.910592	6.4183	10.7438	18.1026
Australia	2000	19062	4.93508	13779.5	6.78065			473.537	467.189	6.38792	93.8627	366.845	473.631	940.726
Australia	2030	24228	6.90413	18544	8.98327			845.833	826.898	6.87337	101.351	542.816	1021.69	1672.73
Austria	2000	8040.5	2.97158	6216.07	3.81978			113.153	125.777	1.48972	4.8569	70.5552	162.028	238.93
Austria	2030	7443	4.91897	6262	5.83128			187.343	178.776	0.964335	3.38061	89.7964	271.978	366.119
Belgium	2000	10199.3	3.11141	7817.98	4.02654			154.656	162.686	2.54736	6.30462	86.1056	222.384	317.342
Belgium	2030	10143	4.54933	8230	5.58192			233.734	227.704	2.0464	5.07803	106.985	347.329	461.438
Canada	2000	30631.1	6.54926	22692.3	8.77586			976.173	1029.93	14.6635	158.157	968.01	865.277	2006.11
Canada	2030	37695	9.39905	29610	11.915			1751.68	1791.29	14.9336	152.201	1378.79	1997.05	3542.97
Denmark	2000	5290.89	2.95801	4044.61	3.82368			79.4557	77.0492	1.85211	3.6708	49.0298	101.952	156.505
Denmark	2030	5342	4.35097	4265	5.41215			119.037	113.391	1.60054	3.09071	57.2863	170.451	232.429
Finland	2000	5152.35	3.051	3887.99	3.91256			75.3794	81.8187	5.07814	5.55218	47.121	99.4468	157.198
Finland	2030	5085	4.70566	4079	5.76716			115.059	124.224	4.04047	4.58705	49.5152	181.14	239.283
France	2000	58898.4	2.90288	43891.2	3.8695			824.745	885.007	11.3826	31.9299	464.002	1202.44	1709.75
France	2030	62935	4.20347	49179	5.35802			1294.92	1350.54	10.4336	28.4903	610.867	1995.66	2645.46
Germany	2000	81644.2	3.21742	64308.6	4.0531			1268.68	1358.16	20.3495	53.4966	826.861	1726.14	2626.84
Germany	2030	77677	4.85448	64707	5.80399			1913.96	1856.85	15.2249	40.1308	892.442	2823.01	3770.81
Greece	2000	10538.5	8.09645	8249.6	10.3221			343.587	509.659	1.71518	105.582	375.971	369.978	853.246
Greece	2030	9953	10.8211	8325	12.9226			445.918	631.105	1.21993	77.8795	462.188	535.736	1077.02
Iceland	2000	277.23	2.23574	191.19	3.18424			3.28142	2.91671	0.110182	0.18598	1.84833	4.05364	6.19813
Iceland	2030	326	3.60287	248	4.69576			6.22565	5.51972	0.0998865	0.188292	3.00263	8.45456	11.7454
Ireland	2000	3789.74	2.26367	2629.62	3.20576			44.8081	40.979	1.48775	2.45842	27.0124	54.8286	85.7871
Ireland	2030	4877	3.21618	3615	4.29418			82.0942	74.759	1.6184	2.73439	44.9917	107.509	156.853
Italy	2000	57181.6	7.43602	45912.9	9.24092			1931.88	2320.16	9.26325	347.345	1667	2228.42	4252.04
Italy	2030	50778	10.5828	43185	12.4291			2495.02	2878.72	6.24168	226.007	1908.62	3232.87	5373.74
Japan	2000	126473	5.34933	100277	6.74196			3262.8	3502.66	4.83928	399.52	3271.34	3089.76	6765.46
Japan	2030	121288	7.34942	101503	8.77837			4135.47	4778.49	3.65491	324.981	3219.65	5365.67	8913.96
Luxembourg	2000	434.501	2.77497	327.421	3.64596			6.00403	6.05323	0.119617	0.257781	3.66628	8.01359	12.0573
Luxembourg	2030	606	3.49722	462	4.55244			10.8238	10.3693	0.16086	0.318606	5.26297	15.4507	21.1931
Malta	2000	388.031	10.0964	280.341	13.9278			16.3588	22.8182	0.131773	3.06112	20.466	15.5181	39.177
Malta	2030	417	13.7574	328	17.4572			24.1914	33.177	0.108904	2.90617	22.7298	31.6235	57.3684
Monaco	2000	33.2291	6.61348	24.7624	8.84665			1.00192	1.19568	0.00695773	0.195	0.851874	1.14377	2.1976
Monaco	2030	39.151	8.77384	30.5941	11.2048			1.59769	1.83735	0.00703185	0.189474	1.15186	2.08668	3.43505
Netherlands	2000	15803.5	2.69355	11986	3.51234			217.379	208.297	4.68604	9.68715	134.203	277.1	425.676
Netherlands	2030	16573	4.34291	13343	5.3645			370.434	349.316	3.96488	8.09406	181.606	526.086	719.75
New Zealand	2000	3763.63	4.7434	2627.38	6.73487			88.9015	89.6226	1.57351	18.6909	69.0939	89.1658	178.524
New Zealand	2030	4371	7.02189	3356	9.10374			153.734	153.193	1.4056	18.4544	97.8752	189.192	306.927
Norway	2000	4441.69	2.92139	3295.74	3.86805			63.443	66.3163	2.27848	3.22617	35.5379	88.7167	129.759
Norway	2030	4856	4.25319	3820	5.35275			105.266	101.269	2.05987	2.9358	50.3133	151.226	206.535
Portugal	2000	9979.94	6.63614	7646.88	8.62867			299.954	362.329	2.4594	57.9917	263.798	338.034	662.283
Portugal	2030	9715	9.08319	7908	11.1346			402.682	479.75	1.90485	45.5513	348.524	486.451	882.432
San Marino	2000	26.3539	7.43574	21.1603	9.24092			0.890325	1.06928	0.00419398	0.160084	0.768289	1.02704	1.9596
San Marino	2030	32.756	10.583	27.8591	12.4291			1.6095	1.85707	0.00395445	0.145785	1.23136	2.08548	3.46657
Spain	2000	39709.3	6.84324	31263.3	8.66265			1250.72	1466.68	9.16983	245.145	1008.2	1454.89	2717.4
Spain	2030	36424	10.2999	31011	12.0788			1760.02	1991.62	5.87694	161.805	1435.74	2148.22	3751.64
Sweden	2000	8777.26	3.32573	6666.31	4.30065			143.971	147.938	5.21372	8.06786	80.948	197.679	291.908
Sweden	2030	8424	4.80073	6868	5.83241			203.809	200.604	3.84308	6.67755	90.2602	303.632	404.413
Switzerland	2000	7131.08	3.0661	5544.18	3.92247			109.777	108.869	1.17742	4.09186	67.3965	145.98	218.646
Switzerland	2030	6562	5.12083	5452	6.1483			168.254	167.775	0.823575	2.83819	70.6892	261.678	336.029
United Kingdom	2000	59099.9	2.9858	44137	3.94167			869.566	895.04	24.8703	43.694	497.28	1198.76	1764.61
United Kingdom	2030	61299	4.35162	48811	5.42244			1362.31	1305.2	20.7567	38.2599	648.094	1960.39	2667.5
United States of America	2000	282042	6.27636	200748	8.75844			8441.47	9260.47	119.531	1390.03	8429.22	7763.16	17701.9
United States of America	2030	358489	8.45557	270583	11.1548			14900.7	15411.6	129.254	1462	11980.3	16740.8	30312.3
FSE	2000	337258	3.45889	248574	4.67084			4711.44	6953.92	54.8887	1585.35	5387.81	4637.31	11665.4
FSE	2030	290269	4.80933	237511	5.8642			5771.45	8188.86	32.1926	1306.03	6121.47	6500.61	13960
Albania	2000	3131.81	2.74859	1912.13	4.4858			44.6933	41.3873	0.306494	21.4178	40.4368	23.9195	86.0806
Albania	2030	3761	5.00173	2706	6.94198			96.6982	91.4169	0.265111	28.0743	86.4422	73.3334	188.115
Belarus	2000	10167.2	7.22942	7434.61	9.86135			254.594	480.437	1.878	118.202	332.408	282.543	735.031
Belarus	2030	9148	10.0788	7439	12.3785			337.727	584.285	1.17452	105.019	409.861	405.958	922.012
Bosnia and Herzegovina	2000	3969.53	2.78763	2906.15	3.78554			55.4258	55.2299	0.642152	19.152	54.2185	36.643	110.656
Bosnia and Herzegovina	2030	4058	4.43466	3348	5.36229			83.7045	96.2538	0.428753	15.6067	78.0658	85.8571	179.958
Bulgaria	2000	7922.98	5.95105	6122.51	7.68154			225.669	245.832	1.19759	61.4318	207.267	201.605	471.501
Bulgaria	2030	5786	7.90961	4828	9.46588			215.716	241.934	0.637217	44.0694	202.165	210.778	457.65
Croatia	2000	4639.36	3.33227	3478.45	4.42588			70.9002	83.6959	0.644161	19.6518	72.4352	61.8649	154.596
Croatia	2030	4457	4.04439	3491	5.14816			81.16	99.0984	0.53601	15.7174	75.112	88.8929	180.258
Czech Republic	2000	10239	3.28456	7860.12	4.25744			157.489	178.817	1.66571	39.8644	162.459	132.317	336.306
Czech Republic	2030	9509	4.63984	7954	5.53323			200.08	241.122	1.08882	33.2973	191.198	215.618	441.202
Estonia	2000	1389.03	3.3086	1036.95	4.40544			19.2203	26.7372	0.275197	5.62898	20.9016	19.1517	45.9574
Estonia	2030	996	4.31409	810	5.28679			18.6166	24.3518	0.145383	3.98789	18.7217	20.1134	42.9684
Hungary	2000	9934.96	3.35109	7604.36	4.35728			148.233	184.697	1.58645	38.5962	155.979	136.768	332.93
Hungary	2030	8534	4.40522	7017	5.34287			165.287	210.654	1.03263	31.3502	168.45	175.109	375.942
Latvia	2000	2415.08	3.39211	1811.38	4.50606			33.4406	48.4816	0.30034	9.90016	37.1236	34.5982	81.9222
Latvia	2030	2012	4.45579	1656	5.40299			38.3013	51.3492	0.17711	8.21059	38.2526	43.0102	89.6505
Lithuania	2000	3682.16	3.09454	2689.67	4.21471			48.8483	65.0975	0.583985	15.5936	51.0683	46.6998	113.946
Lithuania	2030	3341	4.38158	2736	5.33744			63.7418	82.6466	0.355984	13.5132	62.1151	70.4042	146.388
Poland	2000	38505.5	2.94412	27746.9	4.06783			533.745	599.901	4.95012	161.974	528.461	438.262	1133.65
Poland	2030	36577	4.21205	29490	5.21323			699.099	841.544	3.26079	139.19	661.865	736.327	1540.64
Republic of Moldova	2000	4290.06	3.97918	2895.52	5.88252			77.8158	92.8937	0.379867	32.9069	79.7651	57.6576	170.709
Republic of Moldova	2030	3976	6.10609	3143	7.71718			115.987	126.791	0.226906	33.4248	107.819	101.307	242.778
Romania	2000	22372.2	4.88202	16617.2	6.55971			522.845	569.368	2.1745	163.98	490.691	435.367	1092.21
Romania	2030	20128	6.92985	16240	8.57987			677.665	717.175	1.46907	151.797	671.178	570.396	1394.84
Russian Federation	2000	145231	3.15055	107204	4.24383			1548.7	3026.87	25.9926	592.475	2112.67	1844.44	4575.57
Russian Federation	2030	121421	4.38157	100159	5.29719			1886.46	3433.69	14.5335	450.208	2270.87	2584.54	5320.15
Serbia	2000	10522.2	3.07491	7593.89	4.23013			156.87	166.677	2.31524	41.4167	152.546	127.269	323.547
Serbia	2030	9875	3.97893	7846	4.98745			187.561	205.359	1.60423	38.8555	175.986	176.474	392.92
Slovakia	2000	5381.99	2.83751	3882.14	3.90878			72.1494	80.5651	0.970339	22.6477	71.9061	57.1904	152.714
Slovakia	2030	5224	4.21156	4270	5.13805			101.259	118.753	0.617197	20.2806	99.8818	99.2325	220.012
Slovenia	2000	1981.53	3.30996	1526.54	4.27824			30.652	34.9357	0.278842	8.60231	30.653	26.0536	65.5878
Slovenia	2030	1797	4.83078	1519	5.70367			38.7676	48.0415	0.170373	6.10983	35.6416	44.8873	86.8092
The FYR Macedonia	2000	2029.44	2.64563	1401.56	3.81903			27.2824	26.4091	0.16561	8.38459	26.5635	18.5778	53.6915
The FYR Macedonia	2030	2048	4.70859	1646	5.85213			54.2981	42.134	0.106032	10.8983	45.6542	39.7735	96.432
Ukraine	2000	49453.1	3.29354	36849.3	4.39677			682.867	945.894	8.5815	203.525	760.265	656.389	1628.76
Ukraine	2030	37621	4.36347	31213	5.2453			709.32	932.259	4.36297	156.425	722.194	758.597	1641.58
India	2000	1.00894e+06	3.14246	570053	5.53804	12302.3	19403.1	15893.6	15811.8	135.669	9724.89	15499.9	6345.02	31705.4
India	2030	1408922	5.63842	988837	8.02064	21124.3	58316.6	39555.2	39885.7	129.858	18666.1	40213.2	20431.8	79440.9
LAC	2000	512740	2.59523	298872	4.42486	1726.14	11070.4	4927.96	8378.82	82.0968	1901.52	7226.59	4096.57	13306.8
LAC	2030	716392	4.60071	500228	6.57232	2640.34	29403.6	11952.3	21006.7	82.4555	3080.94	17288.3	12507.4	32959.1
Antigua and Barbuda	2000	64.688	4.4694	39.4214	7.3072	2	1	1.23518	1.65599	0.010569	0.519245	1.5025	0.858851	2.89117
Antigua and Barbuda	2030	70.366	6.76861	49.5372	9.60041	2.3	2.5	2.08245	2.68035	0.00702927	0.581576	2.36812	1.80608	4.7628
Argentina	2000	36964.9	3.85813	23403.2	6.05578	84.2678	1341.88	458.754	967.398	8.90745	119.356	709.079	588.81	1426.15
Argentina	2030	48897	5.02493	34826	7.02865	104.069	2352.97	805.255	1651.79	9.24195	178.122	1197.27	1072.4	2457.04
Bahamas	2000	302.916	3.80287	183.696	6.24221	1	10	4.6653	6.8542	0.0528134	2.53295	6.01682	2.91692	11.5195
Bahamas	2030	410	6.35124	291	8.93037	1.4	24.2	11.0123	15.0278	0.052716	3.15827	13.0938	9.73535	26.0401
Barbados	2000	265.741	4.16354	189.441	5.82292	3.69361	7.37061	4.32845	6.73578	0.0332157	2.06092	5.06611	3.90397	11.0642
Barbados	2030	286	7.85533	229	9.79975	4.58857	17.8777	10.2727	12.1936	0.0248138	1.76861	10.5757	10.0971	22.4663
Belize	2000	225.135	2.10464	112.525	4.18447	1.41213	3.32615	2.1674	2.57089	0.0297104	1.08145	2.30571	1.32142	4.73829
Belize	2030	341	4.3277	236	6.24142	3.71662	11.0408	6.6113	8.14615	0.0277026	2.44061	8.1739	4.11525	14.7575
Bolivia	2000	8323.03	2.48497	4161.46	4.92175	48.0183	158.806	94.7272	112.097	2.00763	46.932	109.504	48.3812	206.824
Bolivia	2030	13998	4.01829	8947	6.25956	78.7796	483.7	260.379	302.1	2.43671	112.253	298.277	149.514	562.48
Brazil	2000	170250	2.6743	103812	4.34808	472.9	4080.1	1579.25	2973.75	39.172	600.813	2564.37	1348.65	4553
Brazil	2030	226502	4.99131	161528	6.97532	565.516	10739.9	3674.39	7631.02	38.3087	835.014	5905.92	4526.16	11305.4
Chile	2000	15185.4	3.25927	9578.28	5.15399	38.1963	456.735	166.319	328.612	1.2681	56.9098	263.83	172.923	494.932
Chile	2030	20241	5.17468	14474	7.22747	48.8357	998.572	348.735	698.672	1.30426	73.1495	491.009	481.945	1047.41
Colombia	2000	42047.5	2.10096	24120.7	3.63957	133.198	750.204	384.282	499.12	5.51295	151.815	489.731	236.343	883.401
Colombia	2030	62071	3.90637	42864	5.64301	198.427	2226.3	1073.08	1351.64	5.90663	247.728	1298.6	872.489	2424.72
Costa Rica	2000	4018.14	1.90362	2313.46	3.28605	27.0938	49.3962	35.2514	41.2386	0.468401	12.8132	41.8964	21.312	76.49
Costa Rica	2030	6239	3.79688	4321	5.47004	37.3483	199.539	110.59	126.298	0.527016	23.8226	121.776	90.762	236.888
Cuba	2000	11153	4.3003	8018.05	5.97206	119	361	167.613	312	0.769362	46.1176	257.883	174.843	479.612
Cuba	2030	11679	7.31759	9211	9.27169	151	703	288.302	566.319	0.605683	42.668	399.404	411.943	854.621
Dominica	2000	70.3898	3.82393	42.8961	6.24802	0.457865	2.23379	1.15008	1.54158	0.0115006	0.483115	1.39795	0.799091	2.69166
Dominica	2030	70.454	6.1124	49.5991	8.66488	0.465996	3.84043	1.88309	2.42334	0.0087236	0.525559	2.14003	1.63212	4.30643
Dominican Republic	2000	8365.09	2.93142	4658.79	5.23082	52.2254	192.99	108.309	136.906	1.5226	53.729	131.429	58.5346	245.216
Dominican Republic	2030	11207	5.30326	7614	7.78646	73.5997	520.737	259.297	335.04	1.47605	83.1615	308.616	201.084	594.337
Ecuador	2000	12630	2.69978	7018.24	4.83609	71.7948	269.186	160.829	180.152	1.57274	81.7156	174.665	83.0274	340.981
Ecuador	2030	18638	4.94296	13027	7.05993	131.177	790.093	423.64	497.63	1.57254	148.117	491.518	280.063	921.269
El Salvador	2000	6272.04	1.63592	3379.47	3.01654	37.4872	65.1184	44.3447	58.2609	0.662565	14.8598	55.6014	31.4819	102.606
El Salvador	2030	9414	3.39642	6384	4.99757	38.1762	281.563	138.589	181.15	0.694044	36.1046	185.354	97.5869	319.739
Grenada	2000	93.2712	4.4694	56.8402	7.3072	2	2	1.78095	2.38771	0.0152391	0.74868	2.1664	1.23835	4.16867
Grenada	2030	100.836	7.10025	70.9878	10.0702	3.3	3.8	3.17603	3.98359	0.0109868	0.841069	3.49532	2.81223	7.15961
Guatemala	2000	11377.4	1.22409	5120.06	2.69252	60.3563	78.9138	64.2277	75.0424	1.41151	22.1553	76.6305	39.0729	139.27
Guatemala	2030	21172	2.1106	12867	3.45833	128.546	318.311	200.477	246.381	1.87342	68.9569	254.806	121.221	446.857
Guyana	2000	758.775	2.44126	443.525	4.15908	8.29655	10.2271	7.37088	11.1528	0.0770942	4.30693	9.10897	5.03067	18.5237
Guyana	2030	673	5.42187	481	7.57635	11.0923	25.3969	13.962	22.5272	0.0469535	3.75983	19.622	13.0604	36.4892
Haiti	2000	8135.37	1.97424	3852.15	4.1391	76.3015	84.31	64.4803	96.1312	1.16705	33.5979	85.9838	39.8628	160.612
Haiti	2030	12140	3.30136	7426	5.37975	116.896	283.889	158.03	242.755	1.28443	81.0928	213.695	104.713	400.785
Honduras	2000	6412.47	1.26965	3009.89	2.69902	25.2482	56.1674	36.9022	44.5134	0.178289	14.378	44.9899	21.8695	81.4157
Honduras	2030	10739	2.50684	6877	3.9117	45.6798	223.53	120.866	148.344	0.202362	39.3958	152.058	77.5541	269.21
Jamaica	2000	2567.02	3.14105	1484.01	5.40177	22.3538	58.2776	34.242	46.3894	0.468536	15.4949	37.24	27.4279	80.6314
Jamaica	2030	3402	5.548	2405	7.83001	32.9693	155.774	82.8351	105.908	0.431326	24.9355	96.3854	66.9908	188.743
Mexico	2000	98730.1	2.20653	55845.5	3.88289	320.882	1857.62	757.552	1420.95	10.0874	290.647	1197.37	680.402	2178.51
Mexico	2030	134911	4.54394	95249	6.42625	610.754	5519.52	2044.6	4085.67	9.32937	474.942	3352.71	2293.29	6130.27
Nicaragua	2000	5068.01	1.34348	2304.15	2.92623	19.2529	48.8348	30.0592	38.0286	0.66314	12.4677	37.4471	17.5098	68.0877
Nicaragua	2030	9253	2.66092	5853	4.19271	44.4062	201.809	109.975	136.24	0.815771	35.4264	141.053	68.9199	246.215
Panama	2000	2850.17	2.07778	1684.94	3.49662	16.6053	42.6148	27.6249	31.5952	0.30421	9.13767	32.9076	16.8707	59.2201
Panama	2030	3915	3.95217	2801	5.51363	28.8536	125.874	71.0783	83.6493	0.290836	14.5657	82.9362	56.9348	154.728
Paraguay	2000	5491.95	1.86158	2719.15	3.74454	28.9019	73.335	47.5794	54.6575	0.41701	26.5445	51.4383	23.8371	102.237
Paraguay	2030	10104	3.20987	6283	5.1528	53.9648	270.36	149.271	175.054	0.574652	62.0165	162.93	98.8036	324.325
Peru	2000	25634.5	2.94169	14374	5.24011	118.799	635.288	348.989	405.098	0.876752	173.74	394.054	185.417	754.087
Peru	2030	37172	5.27535	26010	7.53588	195.196	1765.76	880.512	1080.44	0.869081	313.722	1052.81	593.548	1960.95
Saint Kitts and Nevis	2000	38.378	4.4694	23.3879	7.3072	1	1	0.732804	0.982465	0.00627038	0.308057	0.891403	0.509539	1.71527
Saint Kitts and Nevis	2030	33.657	6.771	23.6943	9.60041	1	1	0.996476	1.28244	0.0041674	0.278175	1.1327	0.863871	2.27892
Saint Lucia	2000	146.697	3.57056	83.477	6.24383	3	2	2.10405	3.13386	0.0257504	1.12463	2.51969	1.56783	5.23791
Saint Lucia	2030	183	6.18979	128	8.83197	5.3	6	4.80607	6.52125	0.0224023	1.51115	6.22021	3.57355	11.3273
Saint Vincent and Grenadines	2000	112.999	4.46916	68.8628	7.3072	2	3	2.15751	2.89261	0.0181878	0.907037	2.62463	1.50027	5.05013
Saint Vincent and Grenadines	2030	131.245	6.77082	92.3956	9.60041	2	7	3.88562	5.00074	0.0160091	1.08474	4.41696	3.36865	8.88636
Suriname	2000	415.746	2.17477	238.836	3.76531	1.34444	7.69707	3.87486	5.16666	0.0486077	2.24116	4.00704	2.74471	9.04152
Suriname	2030	441	4.57482	328	6.14144	1.67341	18.5015	8.86846	11.3065	0.0310478	2.66638	10.9246	6.55291	20.175
Trinidad and Tobago	2000	1293.49	4.65864	825.376	7.27807	8.98508	51.2738	26.3065	33.9524	0.187468	11.5738	31.3713	17.1263	60.2589
Trinidad and Tobago	2030	1440	8.66529	1094	11.3932	11.5278	113.252	54.8253	69.955	0.138566	12.9188	61.8825	49.8403	124.78
Uruguay	2000	3324.48	4.63491	2242.13	6.83538	7.042	147.045	47.1983	106.888	0.828541	11.3497	70.8032	71.1052	154.087
Uruguay	2030	3969	5.63422	2879	7.73838	5.28313	218.339	71.7806	151.842	0.834397	13.9931	101.973	106.822	223.622
Venezuela	2000	24151.1	2.4119	13464	4.30174	41.0299	541.471	211.547	370.954	3.31405	79.0553	330.757	169.375	582.501
Venezuela	2030	36548	4.39426	25309	6.33185	68.7984	1537.21	558.266	1047.75	3.48518	140.217	835.148	627.163	1606.01
MEC	2000	617645	3.24644	321061	6.20871	5684.77	11255.1	10290	9761.44	117.688	5423.92	10233	4276.82	20051.4
MEC	2030	1031730	5.117	653403	8.05823	10170.8	29122.8	26801.2	25992.4	140.898	11780.8	27159.6	13712.3	52793.6
Afghanistan	2000	21760.2	2.15295	10015.5	4.66299	300.359	168.126	299.849	168.637	1.46543	121.37	275.04	70.6093	468.485
Afghanistan	2030	50537	2.77657	25598	5.4695	603.336	799.86	897.955	505.241	3.11173	353.158	822.982	223.944	1403.2
Algeria	2000	30269.3	1.40851	16254.5	2.56879	106.904	319.442	243.132	183.214	8.80269	151.748	190.16	75.6355	426.346
Algeria	2030	44915	2.67768	31446	3.79769	199.229	1003.45	680.585	522.097	8.45987	284.409	650.601	259.212	1202.68
Armenia	2000	3780.74	3.16476	2513.9	4.73887	36	84	53.4784	66.173	0.520712	19.1999	64.0934	35.8373	119.651
Armenia	2030	3658	5.62703	3026	6.79369	51	155	94.5504	111.287	0.259772	19.3709	108.662	77.5446	205.837
Azerbaijan	2000	8030.63	4.1962	4909.13	6.83835	91.6743	245.307	130.171	206.81	1.27788	72.6781	150.136	112.889	336.981
Azerbaijan	2030	9137	8.02116	7101	10.3093	174.837	558.057	298.785	434.109	0.833496	88.6876	345.215	298.157	732.894
Bahrain	2000	638.63	5.78552	405.89	9.07748	3	34	23.5626	13.3854	0.103523	12.848	19.2428	4.75379	36.9481
Bahrain	2030	924	10.7672	685	14.5084	4	95	60.2224	39.2667	0.106307	13.48	44.6428	41.2601	99.4892
Cyprus	2000	779.42	6.36956	535.14	9.23623	13.7121	35.9335	20.2443	29.4013	0.218831	7.65381	24.0897	17.6833	49.6456
Cyprus	2030	905	9.62715	686	12.6719	10.0765	77.0492	37.0572	50.0686	0.196184	9.58521	36.3366	41.0077	87.1257
Egypt	2000	67850.8	3.86552	36305.9	7.18099	992.541	1630.25	1358.01	1264.78	15.6683	682.159	1418.33	506.632	2622.79
Egypt	2030	99490	6.76066	68914	9.73822	1988.93	4737.25	3550.69	3175.5	15.187	1317.06	3714.56	1679.38	6726.18
Georgia	2000	5248.13	3.81955	3750.95	5.32761	78	122	87.1996	113.255	0.619099	23.459	105.383	70.9942	200.455
Georgia	2030	4159	5.37028	3364	6.62964	70	153	102.45	120.9	0.328741	18.338	112.291	92.3926	223.35
Iran (Islamic Republic of)	2000	70297.9	2.99184	35021.1	5.96603	501.795	1601.4	927.409	1175.79	13.8305	486.672	1102.39	500.311	2103.2
Iran (Islamic Republic of)	2030	104455	6.14692	71604	8.94906	762.502	5658.26	2785.04	3635.73	12.8795	1124.86	3276.01	2007.01	6420.77
Iraq	2000	22934.5	2.91107	10887.2	6.08714	88.1047	579.536	288.859	378.781	4.91956	162.996	347.569	152.156	667.64
Iraq	2030	43098	4.66252	26836	7.46316	302.328	1707.13	873.931	1135.52	6.64065	388.133	1048.32	566.361	2009.45
Israel	2000	6018.6	4.26505	3788.51	6.743	23	234	136.83	119.867	1.23677	59.7511	118.025	77.683	256.696
Israel	2030	8872	5.63367	6417	7.76778	27	473	282.147	217.673	1.3615	91.3355	225.028	182.095	499.82
Jordan	2000	4908.44	3.96961	2401.25	8.07088	28.9725	165.874	107.442	87.4041	1.04401	57.3818	102.806	33.6147	194.846
Jordan	2030	9344	7.2825	5817	11.6728	57.6723	622.804	373.485	306.992	1.46866	142.678	403.977	132.353	680.477
Kazakhstan	2000	16156.5	2.79972	10253.6	4.38844	197	255	196.679	255.658	2.363	73.1073	260.552	116.314	452.337
Kazakhstan	2030	16045	4.16512	11790	5.65386	232	436	299.848	368.446	1.70333	74.4416	366.197	225.952	668.294
Kuwait	2000	1913.25	5.42415	1059.33	9.76158	3	101	71.844	31.9336	0.37015	28.3172	63.9766	11.1136	103.778
Kuwait	2030	3395	9.3891	2434	13.079	8	311	194.549	124.211	0.416566	54.6394	147.847	115.857	318.76
Kyrgyzstan	2000	4915.52	2.00008	2734.72	3.56375	66	33	44.6982	53.616	0.855466	16.9814	51.2165	29.2608	98.3142
Kyrgyzstan	2030	6721	3.30672	4680	4.73171	122	100	105.215	117.029	0.800627	28.2691	124.859	68.316	222.245
Lebanon	2000	3491.67	4.17524	2065.46	7.02937	7.94468	137.841	69.4985	76.287	0.596921	19.5182	64.4311	61.2393	145.786
Lebanon	2030	4726	7.99161	3445	10.9477	11.8976	365.786	178.494	199.19	0.536145	31.0155	193.501	152.63	377.683
Libyan Arab Jamahiriya	2000	5286.25	1.66757	2801.21	3.10069	5.90163	82.2501	49.7346	38.4171	1.29482	25.6658	47.4013	13.7898	88.1517
Libyan Arab Jamahiriya	2030	8448	2.89864	5849	4.1635	10.2551	234.622	126.687	118.19	1.3542	51.5688	141.574	50.3806	244.877
Morocco	2000	29858.6	1.43113	16299	2.58016	121.243	306.074	241.811	185.506	6.77549	153.181	194.549	72.8118	427.317
Morocco	2030	44123	2.57828	30703	3.68339	193.736	943.879	644.468	493.147	6.70575	278.713	604.521	247.676	1137.62
Oman	2000	2536.51	4.46408	1143.22	9.85584	9.88701	103.345	62.0138	51.218	0.558161	35.3674	58.4657	18.8405	113.232
Oman	2030	6110	5.61905	3221	10.623	26.1156	317.208	167.588	175.736	1.15735	102.628	154.021	85.5174	343.324
Pakistan	2000	141146	3.69639	67283.9	7.71682	2403.48	2813.83	3002.55	2214.76	25.1319	1753.92	2551.21	887.041	5217.31
Pakistan	2030	272661	5.08052	158309	8.72578	4760.51	9092.09	7734.36	6118.25	38.9088	4518.82	6577.74	2717.13	13852.6
Qatar	2000	564.549	6.73888	374.139	10.1459	1.4853	36.559	27.4517	10.5926	0.0846477	16.3679	19.2529	2.3388	38.0443
Qatar	2030	776	11.2815	563	15.5328	1.83411	85.71	53.4336	34.1105	0.0946902	14.3321	34.3922	38.7251	87.5441
Saudi Arabia	2000	20337.2	4.37385	9508.18	9.30487	127	762	535.732	353.786	4.79425	216.689	512.359	155.676	889.518
Saudi Arabia	2030	44779	5.63361	25602	9.82026	187	2336	1364.02	1158.65	8.49009	600.103	1229.78	684.299	2522.67
Syrian Arab Republic	2000	16180.4	3.87783	7588.4	8.22424	185.321	442.125	330.455	296.991	3.35795	189.296	308.852	125.941	627.446
Syrian Arab Republic	2030	29256	7.90481	19058	12.1138	480.944	1831.69	1233.78	1078.85	3.98563	514.569	1324.1	469.977	2312.63
Tajikistan	2000	6079.63	1.53778	3018.33	3.05608	68	26	45.1452	48.3459	1.24866	17.7506	47.7752	26.7167	93.4911
Tajikistan	2030	8475	2.90232	5775	4.24017	149	97	119.808	126.163	1.10129	36.0694	140.927	67.8732	245.971
Tunisia	2000	9457.81	1.75713	5610.43	2.9336	34.8614	131.325	92.9152	73.2713	1.59866	52.4432	75.7193	36.4252	166.186
Tunisia	2030	12780	3.03941	9099	4.2522	47.1757	341.261	211.492	176.945	1.52953	79.2475	213.022	94.6374	388.437
Turkey	2000	66667.1	4.37937	39871.8	7.29608	592.814	2326.79	1214.87	1704.73	10.5177	654.008	1434.67	820.399	2919.6
Turkey	2030	89921	7.14219	63922	10.0312	1211	5211	2664.95	3757.38	10.2051	901.474	3381.62	2129.02	6422.33
Turkmenistan	2000	4736.33	1.69905	2460.83	3.23603	44	36	37.7831	42.6896	0.839526	16.2711	42.7385	20.6237	80.4728
Turkmenistan	2030	7231	3.07528	4985	4.44422	92	131	106.38	115.993	0.828642	31.0403	128.1	62.4037	222.373
United Arab Emirates	2000	2602.99	13.4584	1705.58	20.5161	49	301	264.373	85.9463	0.400928	125.362	196.732	27.8245	350.319
United Arab Emirates	2030	3550	19.2763	2649	25.8175	45	639	451.127	233.181	0.402531	132.375	276.051	275.48	684.309
Uzbekistan	2000	24853.9	1.7284	13123.7	3.2378	271	159	203.302	226.275	4.65563	84.4713	225.606	114.844	429.577
Uzbekistan	2030	35713	3.261	24806	4.67739	615	550	561.161	603.442	4.32891	156.538	666.388	337.348	1164.6
Yemen	2000	18343.1	1.78209	7370.48	4.4007	197.77	129.119	122.966	203.924	2.53682	87.2832	160.249	76.8202	326.89
Yemen	2030	57526	2.23564	25019	5.11036	539.435	746.641	546.972	739.104	7.5155	323.867	666.362	288.331	1286.08
OAI	2000	781001	2.85895	444672	5.00886	7466.69	10488	11332.6	10995.8	55.4124	6367.37	11241.4	4664.28	22328.4
OAI	2030	1.10946e+06	5.23764	763293	7.65951	11592.6	38197.8	29462.9	29059.2	57.5864	11505	30777.1	16182.4	58109.4
Bangladesh	2000	137368	2.32694	69089.2	4.60155	1396.5	1799.97	1629.96	1566.51	17.2926	1169.6	1500.7	508.872	3196.47
Bangladesh	2030	222618	5.0041	145086	7.66468	2670.47	8469.55	5594.74	5545.27	19.6361	3093.02	5787.47	2239.88	11140
Bhutan	2000	2083.07	1.65651	968.399	3.54215	26.4606	8.04567	16.8589	17.6474	0.204135	10.0795	17.0275	7.19513	34.5063
Bhutan	2030	4223	2.57229	2379	4.55191	58.1211	50.5065	53.4958	55.1319	0.3377	33.8837	52.0953	22.3109	108.628
Brunei Darussalam	2000	327.232	5.54739	193.212	9.38276	5	13	10.4578	7.69503	0.024217	5.95669	9.4294	2.74253	18.1528
Brunei Darussalam	2030	497	9.93125	359	13.7419	9	40	26.822	22.5364	0.0249361	8.02432	22.5867	18.7224	49.3583
Cambodia	2000	13099.4	0.842079	5681.41	1.93033	81.436	28.8715	40.7113	69.5961	0.637673	32.2394	60.8802	16.5502	110.307
Cambodia	2030	23824	1.32874	13971	2.25976	148.77	167.788	128.405	188.153	0.846991	88.9473	165.096	61.668	316.558
Cook Islands	2000	19.6013	3.39127	10.5734	6.28024	0	0	0.305264	0.359468	0.000695918	0.128369	0.354592	0.181075	0.664732
Cook Islands	2030	23.727	5.45461	15.6172	8.28311	0	1	0.5953	0.698915	0.000625149	0.182815	0.65884	0.451935	1.29422
Dem. People's Rep. of Korea	2000	22248.7	1.64972	14560.3	2.51771	146	221	164.369	202.673	0.455579	51.4351	219.616	95.535	367.042
Dem. People's Rep. of Korea	2030	26456	2.40123	18973	3.34594	178	457	280.25	355.018	0.443405	58.4086	349.675	226.742	635.268
Fiji	2000	812.481	4.61431	453.871	8.25363	19	18	18.4133	19.0771	0.0296012	11.3457	20.9184	5.19677	37.4904
Fiji	2030	963	7.49873	680	10.6161	24	48	35.9772	36.2355	0.0233601	13.9572	39.8163	18.4158	72.2127
Indonesia	2000	211967	3.97506	125172	6.72204	3536.2	4889.63	4326.2	4099.63	11.7274	2237.1	4265.6	1911.4	8425.83
Indonesia	2030	282851	7.51521	199732	10.6371	4715.23	16541.6	10905.6	10351.3	11.2307	3636.16	11534.2	6075.25	21256.8
Kiribati	2000	82.8561	4.46284	42.772	8.63772	2	2	1.90411	1.79362	0.00320777	1.01711	1.98326	0.694158	3.69773
Kiribati	2030	117.572	5.74228	72.8405	9.26371	3	4	3.38868	3.36264	0.00357968	1.60951	3.3437	1.79452	6.75131
Lao People's Dem. Republic	2000	5274.78	0.863391	2464.39	1.83817	28.2455	17.2965	19.0782	26.4638	0.242229	12.7531	24.394	8.15263	45.542
Lao People's Dem. Republic	2030	9299	1.37471	5623	2.26778	59.1118	68.7224	55.7294	72.1048	0.316836	32.5544	70.8979	24.065	127.834
Malaysia	2000	22197.7	4.24458	12374.5	7.60068	255.261	686.939	496.124	446.076	1.65146	258.514	491.511	190.523	942.2
Malaysia	2030	32957	7.52215	22985	10.7783	392.079	2087	1266.39	1212.68	1.67648	454.514	1224.41	798.477	2479.07
Maldives	2000	289.999	2.24037	129.479	4.9765	2.71021	3.78685	3.34079	3.15626	0.0535354	2.21028	2.97236	1.26088	6.49706
Maldives	2030	640	3.94198	355	7.07989	5.95294	19.2757	12.6551	12.5736	0.0950511	8.06905	12.5399	4.52465	25.2287
Marshall Islands	2000	51.1032	4.46284	26.3805	8.63772	1	1	1.1744	1.10625	0.00197846	0.627322	1.22321	0.428135	2.28065
Marshall Islands	2030	72.053	5.74228	44.6397	9.26371	1	3	2.07672	2.06076	0.00219378	0.986376	2.04916	1.09976	4.13749
Micronesia (Fed. States of)	2000	122.644	4.46281	63.3112	8.63772	4	2	2.81845	2.65491	0.00471491	1.50553	2.93562	1.02749	5.47336
Micronesia (Fed. States of)	2030	220.102	5.74226	136.362	9.26371	7	6	6.34379	6.29504	0.00665447	3.0131	6.25961	3.35945	12.6388
Mongolia	2000	2531.22	1.33729	1357.79	2.46124	12	22	14.7048	19.1449	0.431378	18.5535	11.5212	3.34364	33.8497
Mongolia	2030	3644	2.2149	2549	3.15059	27	54	34.1907	46.5203	0.402545	30.421	38.8948	10.9927	80.711
Myanmar	2000	47704.7	1.13764	27046.6	1.99804	307.628	235.081	230.933	311.775	2.30774	142.743	297.906	99.751	542.708
Myanmar	2030	62538	2.12729	44009	3.01824	484.946	845.42	572.637	757.729	2.06989	252.971	765.495	309.83	1330.37
Nauru	2000	12.2119	14.3541	6.30403	27.7986	0	2	0.941723	0.811184	0.000472784	0.684394	0.794478	0.273561	1.75291
Nauru	2030	21.487	18.039	13.312	29.1119	0	4	2.04407	1.83198	0.000654208	1.34841	1.64824	0.878737	3.87605
Nepal	2000	23031.1	1.89222	11203.4	3.86516	283.574	152.225	217.469	218.33	2.77048	136.184	217.67	79.1743	435.799
Nepal	2030	41723	3.18392	24718	5.35821	551.885	776.54	656.068	672.357	3.98319	405.27	659.209	259.964	1328.43
Niue	2000	2.00091	3.39127	1.07934	6.28024	0	0	0.0311615	0.0366947	7.10396e-05	0.013104	0.0361968	0.0184842	0.0678561
Niue	2030	1.632	5.45461	1.07419	8.28311	0	0	0.0409462	0.0480731	4.29993e-05	0.0125745	0.0453166	0.0310852	0.0890193
Palau	2000	19.1653	4.46284	9.89351	8.63772	0	0	0.440437	0.41488	0.000741984	0.235266	0.458744	0.160564	0.855316
Palau	2030	31.978	5.74228	19.8116	9.26371	0	1	0.921674	0.914592	0.000973624	0.437766	0.909442	0.488086	1.83627
Papua New Guinea	2000	4806.64	3.16266	2334	6.50795	126	26	75.9081	76.1095	0.121812	55.3796	78.9747	17.5415	152.018
Papua New Guinea	2030	8711	4.50487	5140	7.63119	273	119	202.499	189.92	0.175922	115.375	216.716	60.1516	392.419
Philippines	2000	75615.4	3.6633	39075.9	7.07417	723.944	2046.07	1431.5	1338.52	5.71989	787.624	1414.31	562.368	2770.02
Philippines	2030	112575	6.92667	76713	10.1575	1109.47	6688.23	4003.05	3794.65	5.61383	1623.64	4051.19	2117.26	7797.7
Republic of Korea	2000	46704.4	3.98085	33163.4	5.60392	337	1523	986.102	873.133	0.786673	500.52	944.507	413.421	1859.23
Republic of Korea	2030	52521	6.43229	41325	8.17339	321	3057	1809.2	1569.1	0.650435	387.795	1641.48	1348.38	3378.3
Samoa	2000	157.671	2.84475	73.281	6.11211	4	1	1.92672	2.55863	0.00633203	0.757289	2.22272	1.49901	4.48535
Samoa	2030	206.5	3.58531	118.5	6.24225	5	3	3.88491	3.51876	0.00660289	1.53252	4.08582	1.77871	7.40366
Singapore	2000	4008.89	8.17367	2878.42	11.3764	0	327	170.205	157.469	0.211729	83.0248	168.622	75.8148	327.674
Singapore	2030	5058	13.7495	4077	17.0534	0	695	352.382	343.067	0.183735	71.0348	275.765	348.466	695.449
Solomon Islands	2000	446.495	2.83871	198.455	6.37686	10	3	6.36029	6.31441	0.0195076	4.38596	6.49407	1.77516	12.6747
Solomon Islands	2030	1059	3.86016	567	7.20289	25	16	20.5687	20.3104	0.0386943	12.654	22.0749	6.11141	40.8791
Sri Lanka	2000	18899.9	3.45582	12026.9	5.40801	293.019	360.125	337.467	315.678	2.72611	193.977	319.65	136.792	653.145
Sri Lanka	2030	22888	6.71475	16984	9.03515	422.461	1114.41	741.899	794.973	2.3418	269.94	765.97	498.621	1536.87
Thailand	2000	62764.7	2.4477	40216.1	3.81219	1175	361	785.467	750.825	3.17759	417.99	772.297	342.827	1536.29
Thailand	2030	79528	3.44407	59301	4.61342	1382	1357	1357	1382	3.69934	383.964	1407.94	943.897	2739
Tonga	2000	99.039	3.39877	53.4491	6.29108	2	1	1.55079	1.81532	0.00358107	0.648255	1.79066	0.923613	3.36611
Tonga	2030	112.457	5.45466	74.0196	8.28311	3	3	2.82153	3.31262	0.00301924	0.866474	3.12265	2.142	6.13415
Tuvalu	2000	10.175	3.3987	5.49122	6.29108	0	0	0.15932	0.186498	0.000361053	0.0666	0.183967	0.0948895	0.345818
Tuvalu	2030	14.212	5.45461	9.35439	8.28311	0	0	0.356573	0.418636	0.000374452	0.109503	0.394632	0.2707	0.775209
Vanuatu	2000	195.815	3.23481	91.715	6.89829	5	1	3.21408	3.12016	0.00747777	2.20031	3.20522	0.921228	6.33424
Vanuatu	2030	368	4.64635	222	7.69733	10	7	8.38907	8.70949	0.0104876	5.17793	8.97403	2.93611	17.0986
Viet Nam	2000	78045.9	1.01434	43700.5	1.80058	531.709	259.944	336.509	455.144	4.79133	227.87	381.175	177.817	791.653
Viet Nam	2030	110079	2.12833	77039	3.03512	974.072	1368.77	1036.53	1306.3	4.60922	433.446	1336.33	568.457	2342.84
SSA	2000	649582	1.10003	289804	2.45599	3391.55	3754.07	3690.89	3454.73	28.0597	2462.87	3368.02	1286.67	7145.62
SSA	2030	1.2748e+06	1.46259	663481	2.80454	5686.13	12959	9901.29	8743.83	37.5614	6468.92	8465	3673.63	18645.1
Angola	2000	13130.3	0.390423	5433.86	0.937985	25.1847	26.079	22.8786	28.3852	0.294968	16.3819	27.8409	6.74602	51.2637
Angola	2030	32636	0.428251	14317	0.971306	42.334	97.4299	62.9221	76.8419	0.70208	50.7354	71.4203	16.9062	139.764
Benin	2000	6267.66	1.38099	2637.4	3.27682	35.1194	51.4361	48.009	38.5465	0.132899	31.8009	38.8827	15.7389	86.5555
Benin	2030	13317	1.99415	6828	3.88581	63.5457	202.015	147.744	117.817	0.237554	93.7429	119.054	52.5269	265.561
Botswana	2000	1539.93	1.63155	702.391	3.55978	8.32819	16.7965	10.6551	14.4697	0.121161	7.52175	12.6719	4.80995	25.1247
Botswana	2030	1878	2.38146	1113	4.00836	9.89961	34.8241	22.5272	22.1966	0.110667	14.8107	19.1616	10.6408	44.7237
Burkina Faso	2000	11529.7	1.07848	4566.33	2.71792	85.5496	38.795	63.2857	61.0589	0.235164	41.1928	54.5374	28.3792	124.345
Burkina Faso	2030	29172	1.3284	13298	2.9101	198.389	189.132	213.566	173.955	0.536093	150.548	174.938	61.499	387.521
Burundi	2000	6353.46	0.41534	2577.24	1.01915	22.0399	4.34851	11.8708	14.5176	0.122605	13.0988	10.0817	3.08535	26.3884
Burundi	2030	13798	0.52123	6481	1.10603	46.1112	25.8081	35.4633	36.456	0.237566	37.9208	25.7419	8.01904	71.9193
Cameroon	2000	14867.4	0.468761	6775.65	1.02145	23.9983	45.6942	29.8631	39.8295	0.482548	23.0291	36.3754	9.8055	69.6925
Cameroon	2030	25778	0.661845	14454	1.1757	34.5407	136.07	76.1569	94.4535	0.675302	60.279	86.9376	22.7185	170.61
Cape Verde	2000	425.517	1.66557	209.437	3.37614	1.65404	5.43325	3.05022	4.03708	0.0164091	3.0516	2.05735	1.96194	7.0873
Cape Verde	2030	685.75	3.5624	460.75	5.29833	2.95941	21.4697	12.6053	11.8239	0.0170865	6.45974	12.7189	5.23338	24.4291
Central African Republic	2000	3714.47	0.47861	1718.49	1.02962	7.41763	10.3602	7.53729	10.2406	0.0839135	5.50969	9.52816	2.65608	17.7778
Central African Republic	2030	6402	0.588772	3427	1.09624	9.85834	27.8348	16.336	21.3572	0.125073	13.5483	18.683	5.33681	37.6932
Chad	2000	7882.06	1.2253	3400.37	2.83574	59.4674	37.1112	47.0344	49.5442	0.153034	27.8958	48.2958	20.2341	96.5786
Chad	2030	18682	1.4399	8802	3.05232	113.161	155.841	134.692	134.311	0.337367	85.0284	132.671	50.9657	269.002
Comoros	2000	704.938	0.631273	317.778	1.39378	2.23521	2.21487	2.257	2.19308	0.0209649	2.16598	1.72246	0.540675	4.45008
Comoros	2030	1453	1.02356	834	1.77924	4.67632	10.196	7.71983	7.15253	0.0335192	6.28285	6.57833	1.97766	14.8724
Congo	2000	3016.36	0.479612	1308.24	1.09928	3.35086	11.116	5.7037	8.76312	0.0856768	5.31887	7.243	1.81928	14.4668
Congo	2030	4270	0.915234	3390	1.14721	4.92284	34.1576	15.8695	23.211	0.190151	15.5592	18.7572	4.57395	39.0805
Cote d'Ivoire	2000	16006.3	1.64673	7337.36	3.58736	96.5637	167.017	160.612	102.969	0.362766	88.4738	127.688	47.0557	263.58
Cote d'Ivoire	2030	26479	2.40143	15566	4.08209	162.03	473.845	373.976	261.899	0.456672	212.412	289.521	133.486	635.875
Dem. Republic of the Congo	2000	50932.7	0.571313	20697.6	1.3982	155.912	135.074	144.393	146.592	1.59157	131.85	116.977	40.5664	290.985
Dem. Republic of the Congo	2030	132631	0.686154	60053	1.50905	311.316	598.737	468.123	441.93	3.8205	463.464	326.46	116.309	910.053
Djibouti	2000	631.196	1.17849	291.576	2.54443	0.679204	6.7594	3.32245	4.11615	0.0196553	2.65685	3.68846	1.07363	7.4386
Djibouti	2030	859	1.08365	418	2.22081	0.532653	8.77587	4.56411	4.74441	0.0255227	4.76662	2.53053	1.98585	9.30853
Equatorial Guinea	2000	455.671	1.7498	210.541	3.78187	2.78874	5.18458	4.36405	3.60927	0.0109307	2.50273	3.77656	1.68309	7.97332
Equatorial Guinea	2030	994	2.09946	506	4.11994	3.88935	16.9793	11.5976	9.27109	0.0217607	7.03294	9.63845	4.17551	20.8687
Eritrea	2000	3656.89	1.29159	1669.72	2.82398	32.3603	14.8717	23.4277	23.8043	0.0794807	14.1819	24.3171	8.65348	47.232
Eritrea	2030	7738	1.83457	4181	3.39194	67.29	74.6693	71.1186	70.8407	0.142269	41.0868	69.9291	30.8011	141.959
Ethiopia	2000	62889.1	1.26516	27978.4	2.83979	557.635	238.015	394.644	401.007	1.12404	234.332	408.239	151.955	795.651
Ethiopia	2030	127024	1.4328	61397	2.96087	958.971	861.029	919.786	900.213	2.11303	589.231	835.81	392.845	1820
Gabon	2000	1228.13	0.630786	621.784	1.24039	0.797202	6.94969	3.25162	4.49527	0.0343579	2.17794	4.25091	1.28369	7.74689
Gabon	2030	2399	0.602866	1278	1.1267	0.692176	13.7706	6.25857	8.20418	0.0635198	5.06919	7.03178	2.29826	14.4628
Gambia	2000	1301.58	1.65942	654.171	3.29863	16.3772	5.22151	12.1602	9.43855	0.0200627	7.53649	10.5984	3.44375	21.5987
Gambia	2030	2204	2.78943	1302	4.71975	20.3885	41.0905	37.8212	23.6578	0.0279523	18.6525	29.2932	13.5054	61.479
Ghana	2000	19296.6	1.56532	9124.11	3.30434	134.536	167.517	168.608	133.445	0.560828	104.321	140.801	56.3695	302.053
Ghana	2030	32840	2.58983	20236	4.19947	271.646	578.854	480.428	370.072	0.694882	256.18	412.385	181.24	850.501
Guinea	2000	8151.34	0.41405	3662.98	0.917522	17.1022	16.6484	15.4382	18.3124	0.14196	11.3004	18.1871	4.12125	33.7506
Guinea	2030	15591	0.570887	8267	1.07385	33.6317	55.3753	41.8312	47.1758	0.231648	27.6245	49.1666	11.9841	89.0069
Guinea-Bissau	2000	1197.97	1.44255	555.633	3.10717	10.6619	6.61949	9.52445	7.75692	0.0168938	5.5948	8.23513	3.43454	17.2814
Guinea-Bissau	2030	2413	1.83529	1207	3.66644	13.761	30.5246	24.6787	19.6069	0.0317182	15.2518	20.2526	8.74946	44.2856
Kenya	2000	30652.9	0.597399	13494.8	1.35117	92.1718	90.9483	93.2238	89.8963	0.782849	91.7183	65.2537	25.3652	183.12
Kenya	2030	46890	1.06149	28151	1.76504	137.264	360.468	258.822	238.91	0.854978	228.438	195.443	72.9966	497.733
Lesotho	2000	2033.19	1.54415	1019.07	3.07454	17.6701	13.7255	14.1753	17.2203	0.0638826	7.89207	16.586	6.85368	31.3956
Lesotho	2030	2274	1.8317	1288	3.22909	14.3802	27.2726	20.7805	20.8723	0.0621112	12.4306	16.9573	12.2028	41.6528
Liberia	2000	2911.22	1.36532	1281.18	3.0953	15.13	24.6174	22.5583	17.1891	0.0910649	13.4367	18.3438	7.87583	39.7474
Liberia	2030	8910	1.72612	4126	3.72104	35.8805	117.917	88.7188	65.0785	0.267266	49.2817	84.7502	19.4981	153.797
Madagascar	2000	15963.7	0.627061	7156.86	1.39171	54.4566	45.6453	50.7143	49.3876	0.499241	47.0239	39.3224	13.2562	100.102
Madagascar	2030	34311	0.87602	17986	1.666	102.494	198.077	153.447	147.124	0.925434	133.825	122.122	43.6981	300.571
Malawi	2000	11303.9	0.483475	4834.61	1.1276	32.8812	21.7701	26.41	28.2413	0.13627	25.9169	21.8046	6.79355	54.6513
Malawi	2030	21751	0.542876	10388	1.1344	63.4812	54.5999	61.3823	56.6987	0.239354	62.5335	40.7589	14.5493	118.081
Mali	2000	11334.9	1.239	4895.45	2.86433	75.6564	64.7831	66.0654	74.3741	0.21742	38.6082	65.4207	36.1932	140.439
Mali	2030	26891	1.50711	12512	3.23524	133.02	272.258	203.984	201.295	0.48549	119.358	193.521	91.913	405.278
Mauritania	2000	2662.89	1.27148	1200.78	2.81308	9.0941	24.7641	16.5852	17.2731	0.0793259	10.1835	16.683	6.91243	33.8582
Mauritania	2030	6029	1.71139	3071	3.35457	11.2242	91.9552	51.5901	51.5893	0.160484	29.1755	52.2472	21.5962	103.179
Mauritius	2000	1159.5	9.58517	760.184	14.6114	46.1823	64.9581	54.1646	56.9759	0.066778	29.7462	56.2535	25.074	111.14
Mauritius	2030	1399	16.6257	1042	22.3161	62.5851	170.008	110.315	122.278	0.0597008	33.8679	116.131	82.5343	232.593
Mozambique	2000	18286.1	0.728966	8314.37	1.59899	56.9172	76.3821	67.18	66.1193	0.353183	58.6741	54.8303	19.4417	133.299
Mozambique	2030	30443	0.895411	15662	1.73711	72.5414	200.049	142.069	130.521	0.523521	133.649	99.82	38.5978	272.59
Namibia	2000	1754.75	1.43179	800.797	3.12213	13.2826	11.8416	11.1979	13.9264	0.122322	6.794	12.4307	5.77724	25.1242
Namibia	2030	2983	2.00582	1667	3.57917	20.4005	39.433	29.3539	30.4796	0.168747	18.143	28.5721	12.9497	59.8335
Niger	2000	10828.8	0.996208	4268.85	2.52235	71.0507	36.8261	53.99	53.8869	0.201284	36.5677	53.265	17.8428	107.877
Niger	2030	30141	1.26771	13001	2.93497	168.171	213.931	197.642	184.46	0.525923	126.923	191.499	63.1536	382.102
Nigeria	2000	113819	1.49945	49938.1	3.41154	664.212	1042.44	962.561	744.094	2.99897	586.517	795.101	322.038	1706.65
Nigeria	2030	220391	2.1936	120441	4.0101	1076.31	3758.19	2793.73	2040.77	4.69229	1677.4	2188.87	963.536	4834.5
Rwanda	2000	7606.28	0.399865	3309.32	0.916366	26.8685	3.54637	14.732	15.6828	0.0893577	15.8639	11.2828	3.17871	30.4148
Rwanda	2030	14161	0.542526	7309	1.04918	57.7364	19.0907	37.828	38.9991	0.142491	39.1862	30.1799	7.31843	76.8271
Sao Tome and Principe	2000	137.516	0.436174	67.6844	0.878491	0.21881	0.380998	0.191337	0.408471	0.00520644	0.275136	0.211231	0.108234	0.599808
Sao Tome and Principe	2030	224.131	0.960135	150.43	1.42689	0.466762	1.6852	0.873353	1.27861	0.005495	0.597428	1.23447	0.314562	2.15196
Senegal	2000	9418.68	1.5224	4228.96	3.38509	51.2091	92.1812	80.145	63.2453	0.236303	52.2821	68.5598	22.312	143.39
Senegal	2030	17913	2.35056	10107	4.16247	88.746	332.311	235.23	185.827	0.35543	141.719	205.099	73.8832	421.057
Seychelles	2000	80.3423	9.58195	52.6733	14.6114	1.70164	5.99673	3.75177	3.9466	0.00204044	2.06112	3.89782	1.73739	7.69837
Seychelles	2030	116.273	16.1464	86.5285	21.6942	2.38	16.3939	8.8828	9.89106	0.0021935	2.72668	9.37682	6.66818	18.7739
Sierra Leone	2000	4403.19	1.48624	2001.69	3.26577	30.3855	35.0563	35.9424	29.4994	0.071147	22.5272	31.5717	11.2717	65.4419
Sierra Leone	2030	10148	1.7527	4884	3.63857	50.3376	127.526	99.354	78.5096	0.155952	62.7551	82.9591	31.9934	177.864
Somalia	2000	8774.86	1.10349	3635.72	2.65833	55.088	41.7414	48.0431	48.7862	0.180008	30.9917	48.4391	17.2185	96.8294
Somalia	2030	24658	1.34438	10966	3.01858	123.313	208.184	165.793	165.704	0.479589	104.988	165.518	60.512	331.497
South Africa	2000	43295.2	1.87936	23868	3.36888	269.932	543.74	372.453	441.219	9.58763	235.377	420.802	147.906	813.672
South Africa	2030	43936	2.92765	28107	4.54861	197.342	1088.95	581.084	705.207	7.81184	286.439	597.174	394.866	1286.29
Sudan	2000	31081.3	1.43869	15341.4	2.88423	210.741	236.423	223.986	223.179	4.68491	129.269	226.045	87.1658	447.165
Sudan	2030	52575	2.42929	32823	3.87327	343.495	933.707	647.038	630.163	5.87907	316.053	665.96	289.309	1277.2
Swaziland	2000	923.56	1.40559	439.85	2.94483	7.56322	5.41823	6.01445	6.967	0.0286377	3.63973	6.62635	2.68673	12.9815
Swaziland	2030	1195	1.73925	654	3.17309	8.43305	12.351	10.291	10.4931	0.0320296	6.81417	8.71889	5.21897	20.7841
Togo	2000	4526.15	1.40793	2027.4	3.13668	31.9085	31.8166	35.3358	28.3893	0.132235	21.8792	29.3925	12.3211	63.7251
Togo	2030	9050	2.0282	4860	3.77223	57.6828	125.869	103.897	79.655	0.221736	62.4936	84.7342	36.1025	183.552
Uganda	2000	23299.3	0.421217	9264.72	1.05622	73.7648	24.3759	48.9357	49.2051	0.284694	49.1745	36.8434	11.8381	98.1407
Uganda	2030	62679	0.523822	27586	1.18761	178.856	149.471	165.413	162.913	0.711867	175.219	120.676	31.7203	328.326
United Rep. of Tanzania	2000	35109.7	0.572886	15350.1	1.30624	101.658	99.4809	100.572	100.567	0.629532	98.0374	79.5338	22.9377	201.139
United Rep. of Tanzania	2030	65587	0.92206	36859	1.63823	173.71	431.042	308.316	296.435	0.91526	283.354	242.794	77.6888	604.752
Zambia	2000	10416.6	0.675685	4399.45	1.59496	30.4891	39.8944	36.3523	34.0312	0.213941	31.6596	27.8151	10.6948	70.3835
Zambia	2030	21288	0.876032	10502	1.7721	54.8262	131.663	100.158	86.3316	0.383498	92.1997	70.4942	23.4123	186.49
Zimbabwe	2000	12619.3	0.852761	5400.91	1.98157	51.5593	56.0529	53.7184	53.8937	0.5896	34.8588	45.711	26.4527	107.612
Zimbabwe	2030	19610	1.34963	11436	2.30846	76.5038	188.159	139.505	125.158	0.667658	93.6625	110.715	59.6174	264.663
EME=established market economies
FSE=former socialist economies
LAC=Latin-American countries
MEC=Middle Eastern crescent
OAI=other Asia and islands
SSA=sub-Saharan Africa
